# Supplementary material for: Translational initiation in E. coli occurs at the correct sites genome-wide in the absence of mRNA-rRNA base-pairing
Source: eLife journal article supplement (doi:10.7554/elife.55002), 2020-02-17
Supplement: supp [file elife-55002-supp-v1.zip]

Archive with 8 entries (8 files):
- elife_poa_e55002_Figure_3_figure_supplement_1.ai
- elife_poa_e55002_Transparent_Reporting_File.pdf
- elife_poa_e55002_Figure_4_figure_supplement_1.ai
- elife_poa_e55002_Figure_2_figure_supplement_1.ai
- elife_poa_e55002_Figure_1_figure_supplement_2.ai
- elife_poa_e55002_Figure_2_figure_supplement_2.ai
- elife_poa_e55002_Figure_1_figure_supplement_1.ai
- elife_poa_e55002_Figure_5_figure_supplement_1.ai
